# Supplementary material
Source: Springer Nature journal article supplement (https://www.springermedizin.de/resource/supplementary/12885_2013_4787_MOESM4_ESM.pdf/9467302)

## Unadjusted Hazard Ratio

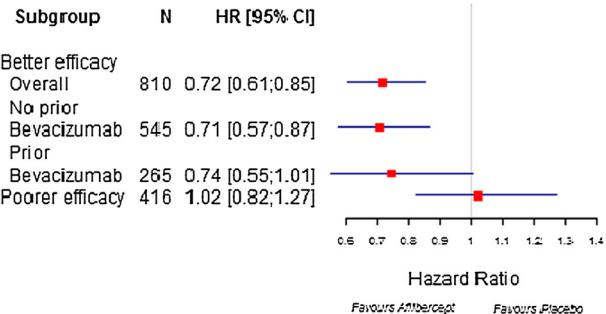

## Adjusted Hazard Ratio

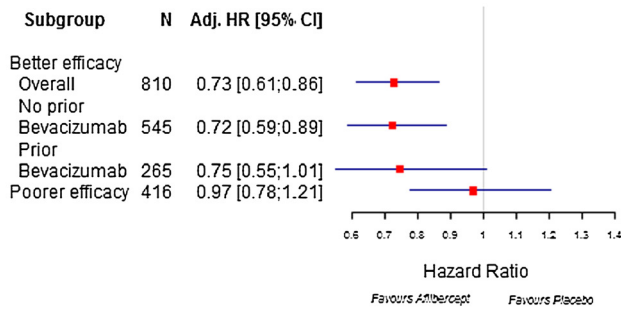

Supplement: MOESM4 [file 9467302]
